# Supplementary material
Source: PubMed Central journal article supplement (PMC6171749)

A

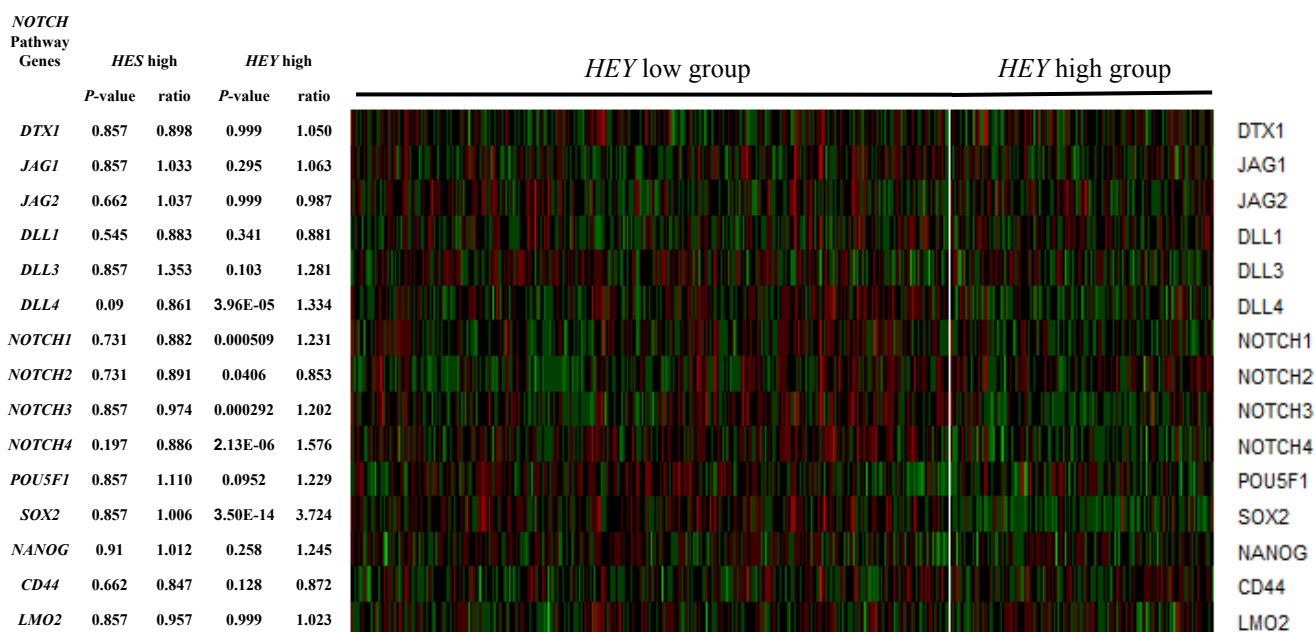

Supplement: NIHMS921102-supplement-4.pdf [file NIHMS921102-supplement-4.pdf]

**A**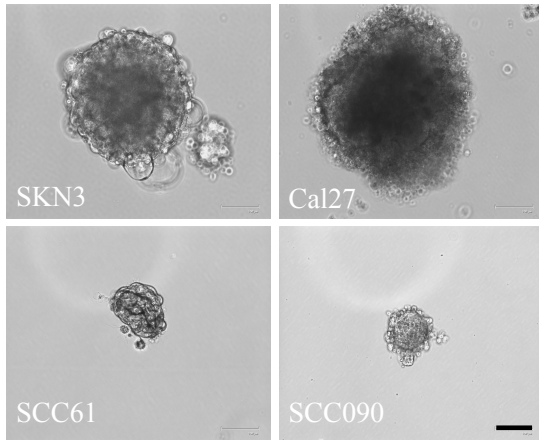**B**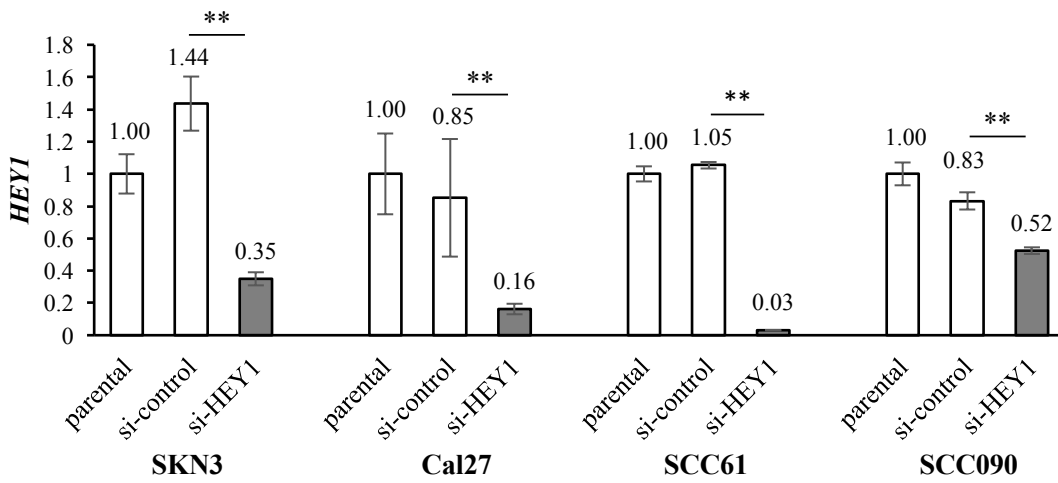**C**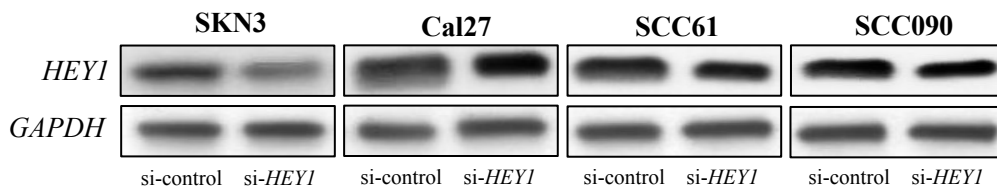

D

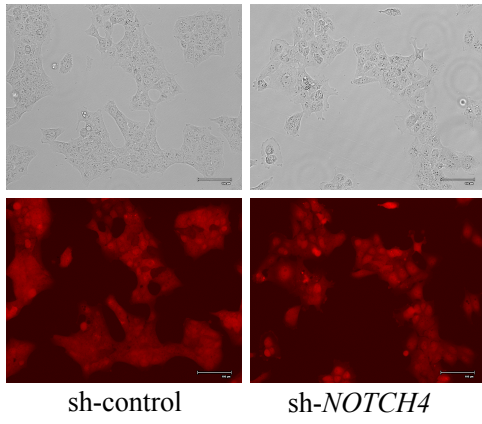

E

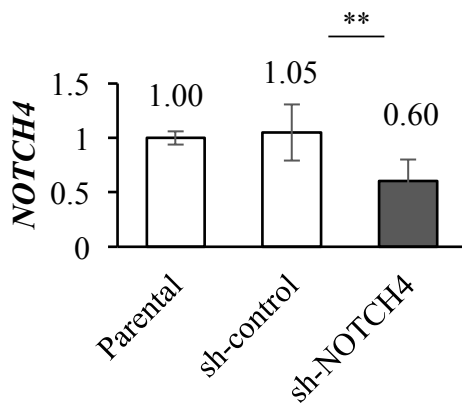

F

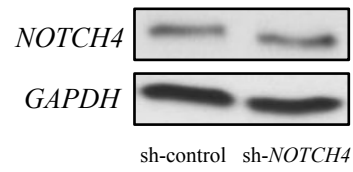

Supplement: NIHMS921102-supplement-6.pdf [file NIHMS921102-supplement-6.pdf]

A

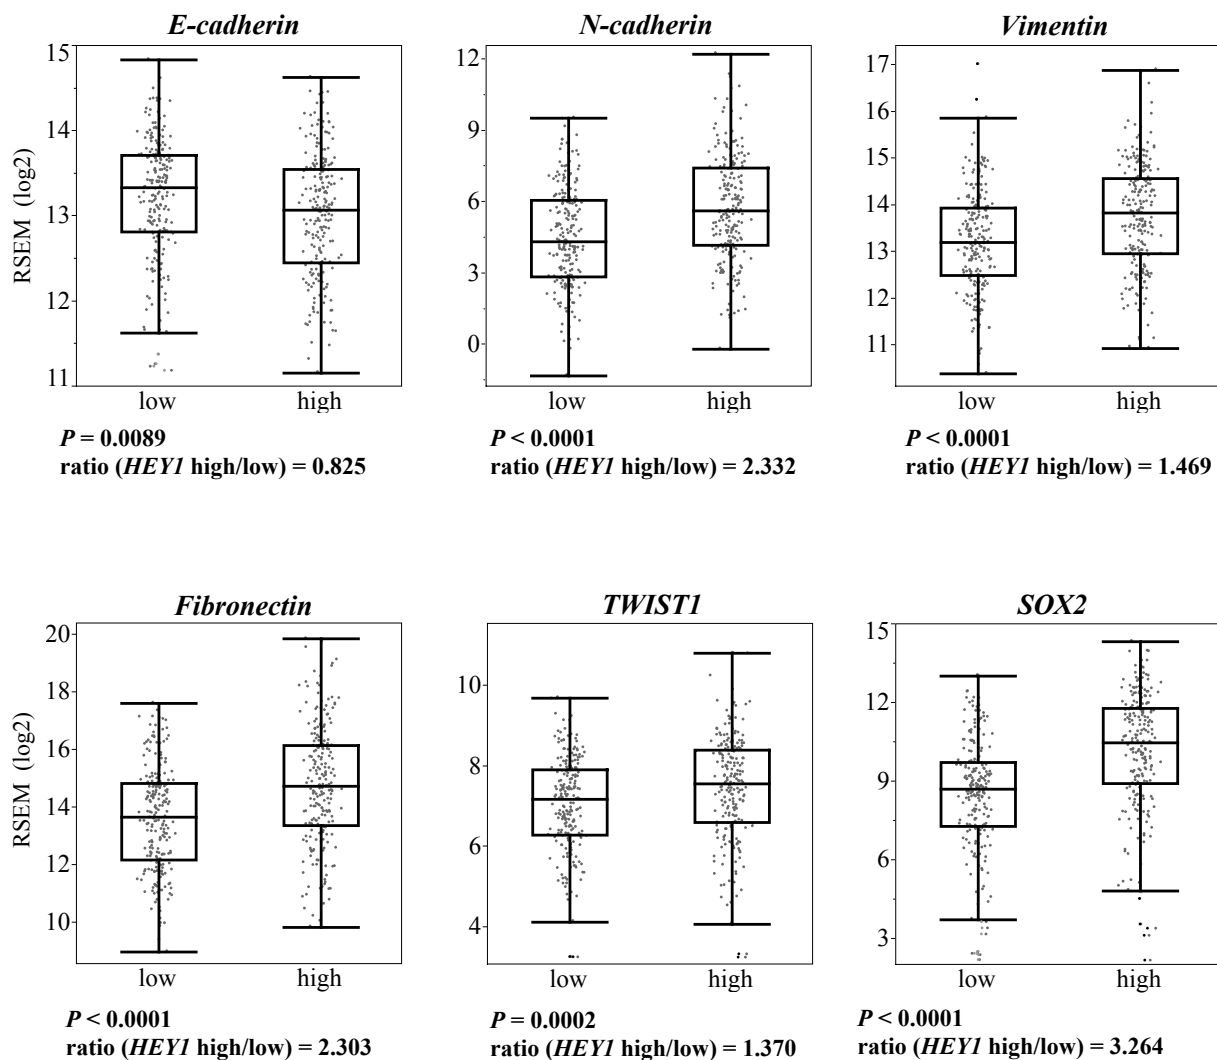

Supplement: NIHMS921102-supplement-7.pdf [file NIHMS921102-supplement-7.pdf]

**A**

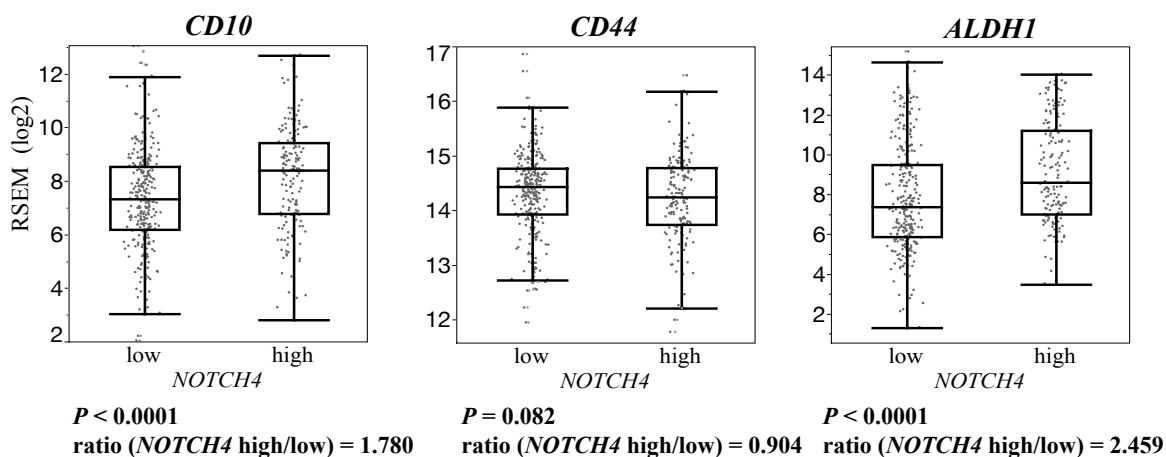

**B**

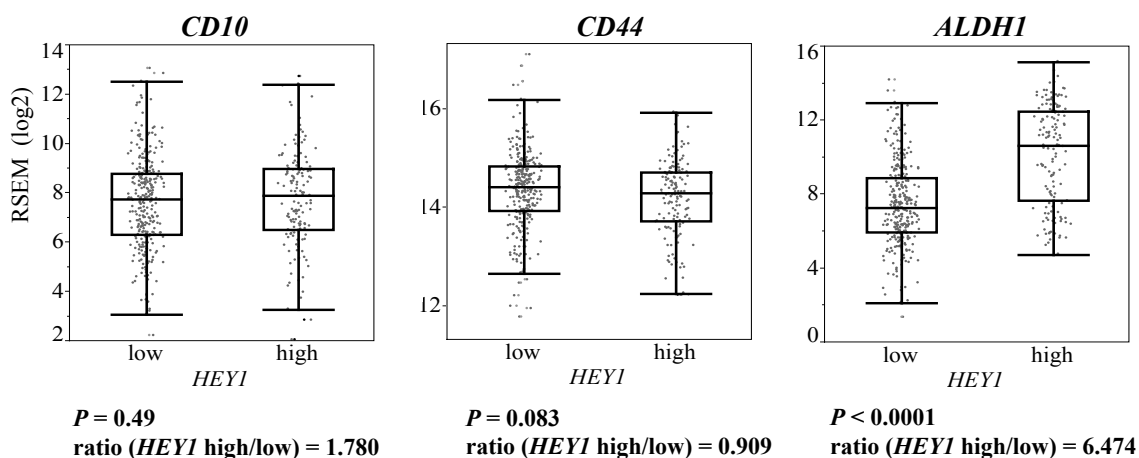

**C**

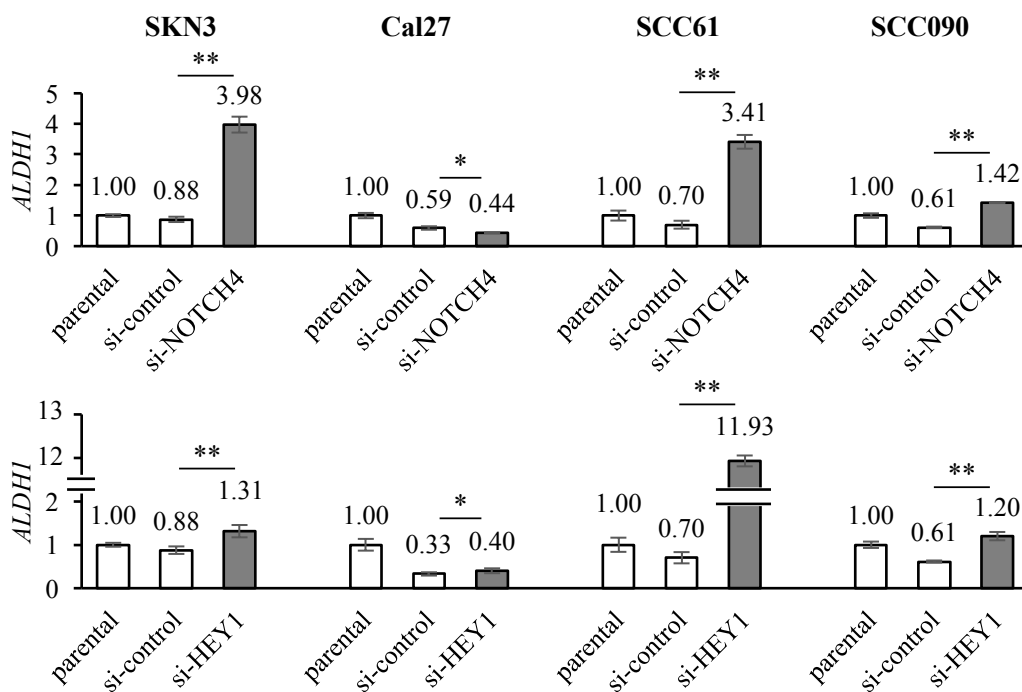

D

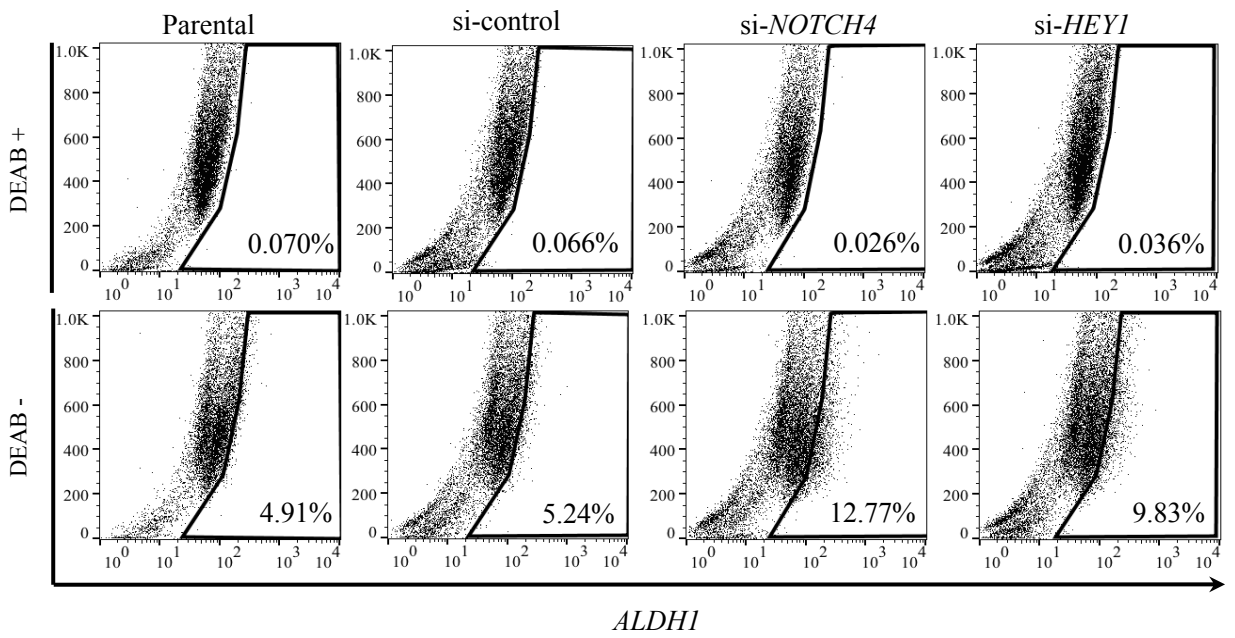

E

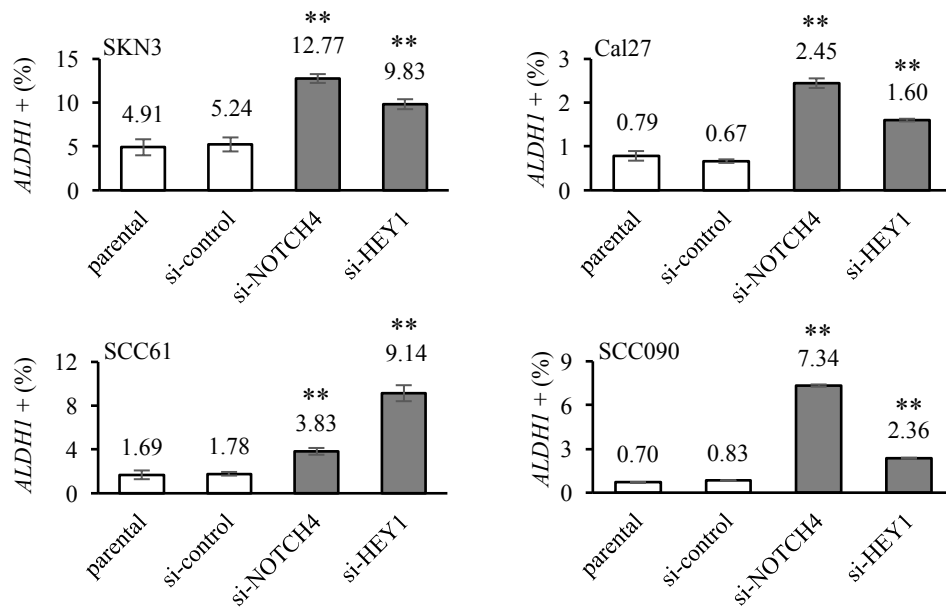

Supplement: NIHMS921102-supplement-8.pdf [file NIHMS921102-supplement-8.pdf]

A

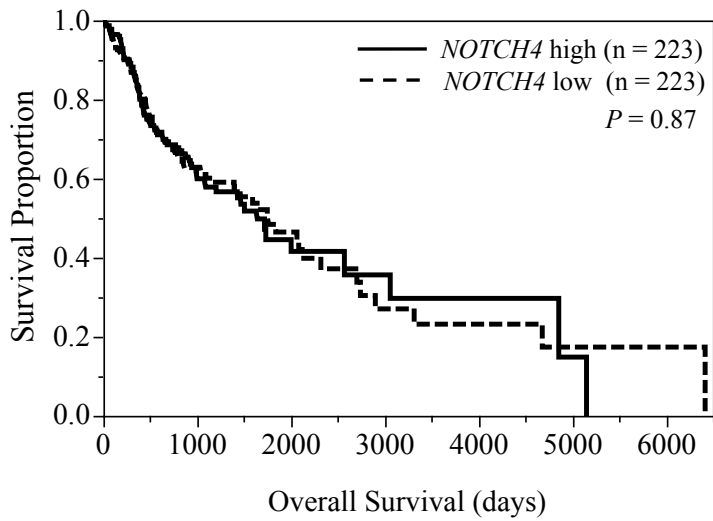

B

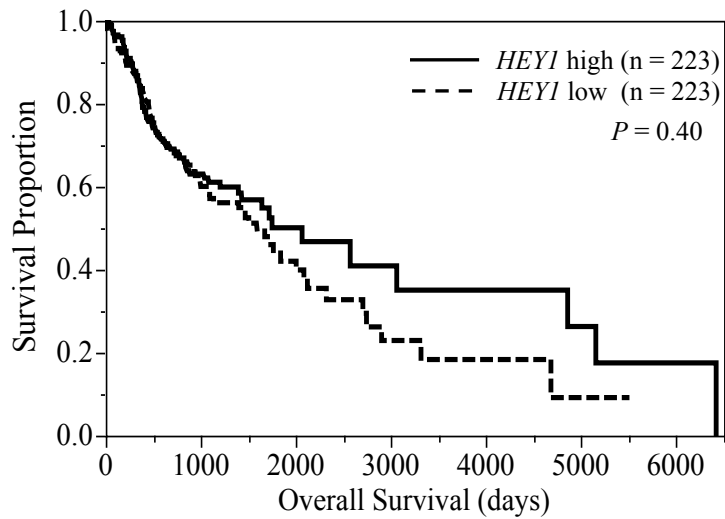

Supplement: NIHMS921102-supplement-9.pdf [file NIHMS921102-supplement-9.pdf]
